# Supplementary material
Source: MDPI journal article supplement (https://www.mdpi.com/2311-7524/9/6/617)
Supplement: s1 [file s1]

**Table S1.** Different genotypes of *Geranium* sp. used in this study

| <b>Genotypes</b>                |                                            |                            |
|---------------------------------|--------------------------------------------|----------------------------|
| <b>Code</b>                     | <b>Name</b>                                | <b>Source</b>              |
| <b>Subgenus <i>Geranium</i></b> |                                            |                            |
| G01                             | <i>G.</i> ‘Anne Thomson’                   | Denis-Plants               |
| G02                             | <i>G.</i> ‘Azure Rush’                     | Denis-Plants               |
| G03                             | <i>G.</i> ‘Bob’s Blunder’                  | Denis Plants               |
| G04                             | <i>G.</i> ‘Brookside’                      | Jan Spruyt - Van der Jeugd |
| G05                             | <i>G.</i> ‘Catherine Deneuve’              | Jan Spruyt - Van der Jeugd |
| G06                             | <i>G.</i> ‘Chantilly’                      | Jan Spruyt - Van der Jeugd |
| G07                             | <i>G.</i> ‘Dragon Heart’                   | Jan Spruyt - Van der Jeugd |
| G09                             | <i>G. pratense</i> ‘Galactic’              | Denis Plants               |
| G13                             | <i>G. x riversleaianum</i> ‘Mavis Simpson’ | Denis-Plants               |
| G14                             | <i>G.</i> ‘Orion’                          | Jan Spruyt - Van der Jeugd |
| G16                             | <i>G.</i> ‘Rozanne’                        | Denis-Plants               |
| G17                             | <i>G.</i> ‘Salome’                         | Jan Spruyt - Van der Jeugd |
| G18                             | <i>G.</i> ‘Sanne’                          | Denis-Plants               |
| G19                             | <i>G. nodosum</i> ‘Silverwood’             | Denis Plants               |
| G21                             | <i>G. wallichianum</i> ‘Sylvia’s Surprise’ | Denis Plants               |
| G22                             | <i>G.</i> ‘Tanya Rendall’                  | Jan Spruyt - Van der Jeugd |
| G24                             | <i>G.</i> ‘Tiny Monster’                   | Jan Spruyt - Van der Jeugd |
| G35                             | <i>G. endressii</i>                        | Jan Spruyt - Van der Jeugd |
| G37                             | <i>G. endressii</i> ‘Trevor Bath’          | Jan Spruyt - Van der Jeugd |
| G38                             | <i>G. himalayense</i> ‘Baby Blue’          | Jan Spruyt - Van der Jeugd |
| G39                             | <i>G. himalayense</i> ‘Derrick Cook’       | Jan Spruyt - Van der Jeugd |
| G45                             | <i>G. maculatum</i> ‘Album’                | Jan Spruyt - Van der Jeugd |
| G46                             | <i>G. maculatum</i> ‘Elizabeth Ann’        | Jan Spruyt - Van der Jeugd |
| G49                             | <i>G. x oxonianum</i> ‘Katherine Adele’    | Jan Spruyt - Van der Jeugd |
| G50                             | <i>G. x oxonianum</i> ‘Southcombe Double’  | Jan Spruyt - Van der Jeugd |
| G57                             | <i>G. pratense</i> ‘Algera Double’         | Denis-Plants               |
| G61                             | <i>G. pratense</i> ‘Purple Ghost’          | Jan Spruyt - Van der Jeugd |
| G62                             | <i>G. psilostemon</i>                      | Denis Plants               |
| G64                             | <i>G. renardii</i>                         | Jan Spruyt - Van der Jeugd |
| G69                             | <i>G. sanguineum</i> ‘Album’               | Jan Spruyt - Van der Jeugd |
| G71                             | <i>G. sylvaticum</i> ‘Album’               | Kwekerij Jan Neelen        |
| G73                             | <i>G. versicolor</i>                       | Jan Spruyt - Van der Jeugd |
| G75                             | <i>G.</i> ‘Bloomtime’                      | Kwekerij Jan Neelen        |
| G76                             | <i>G. wallichianum</i> ‘Havana Blue’       | Jan Spruyt - Van der Jeugd |
| G77                             | <i>G. wlassovianum</i>                     | Jan Spruyt - Van der Jeugd |

|                                   |                                       |                            |
|-----------------------------------|---------------------------------------|----------------------------|
| G80                               | <i>G. 'Blushing Turtle'</i>           | Denis-Plants               |
| <b>Subgenus <i>Erodioidea</i></b> |                                       |                            |
| G10                               | <i>G. cinereum</i> 'Jolly Jewel Red'  | Jan Spruyt - Van der Jeugd |
| G30                               | <i>G. cinereum</i> 'Laurence Flatman' | Kwekerij Jan Neelen        |
| G54                               | <i>G. phaeum</i> 'Angelina'           | Jan Spruyt - Van der Jeugd |
| <b>Subgenus <i>Robertium</i></b>  |                                       |                            |
| G27                               | <i>G. x cantabrigiense</i> 'Biokovo'  | Denis-Plants               |
| G42                               | <i>G. macrorrhizum</i> 'Czakov'       | Denis Plants               |
| G44                               | <i>G. macrorrhizum</i> 'White Ness'   | Jan Spruyt - Van der Jeugd |

**Table S2.** Cross combinations that were done for pollen tube growth evaluation with their respective parental difference variables

| Combination | Chrom | DNA  | Style (mm) | cJaccard |
|-------------|-------|------|------------|----------|
| G03 x G04   | 10    | 0.02 | 9.4        | 0.777    |
| G03 x G35   | 12    | 0.02 | 5.7        | 0.842    |
| G04 x G06   | 0.0   | 0.08 | 02         | 0.847    |
| G04 x G09   | 0.0   | 0.01 | 01         | 0.686    |
| G04 x G14   | 14    | 0.0  | 1.6        | 0.335    |
| G04 x G21   | 0.0   | 0.08 | 07         | 0.821    |
| G04 x G27   | 18    | 0.13 | 13.6       | 0.855    |
| G04 x G38   | 28    | 0.03 | 4.3        | 0.664    |
| G04 x G39   | 28    | 0.03 | 1.3        | 0.641    |
| G04 x G44   | 64    | 0.13 | 14.6       | 0.855    |
| G04 x G54   | 0.0   | 0.04 | 1.4        | 0.863    |
| G04 x G69   | 56    | 0.06 | 4.4        | 0.809    |
| G05 x G04   | 26    | 0.03 | 2.4        | 0.771    |
| G05 x G49   | 28    | 0.01 | 01         | 0.708    |
| G06 x G49   | 02    | 0.06 | 1.4        | 0.828    |
| G07 x G49   | 62    | 0.0  | 4.3        | 0.849    |
| G09 x G04   | 0.0   | 0.01 | 01         | 0.686    |
| G14 x G04   | 14    | 0.0  | 1.6        | 0.335    |
| G14 x G09   | 14    | 0.01 | 0.6        | 0.668    |
| G14 x G16   | 0.0   | 0.06 | 3.6        | 0.703    |
| G14 x G21   | 14    | 0.08 | 8.6        | 0.773    |
| G18 x G04   | 10    | 0.06 | 9.4        | 0.834    |
| G19 x G54   | 0.0   | 0.01 | 3.3        | 0.861    |
| G22 x G24   | 71    | 0.02 | 5.7        | 0.788    |
| G22 x G35   | 12    | 0.02 | 06         | 0.683    |
| G27 x G04   | 18    | 0.13 | 13.6       | 0.855    |
| G27 x G24   | 63    | 0.09 | 17.6       | 0.859    |

|           |     |      |      |       |
|-----------|-----|------|------|-------|
| G27 x G44 | 46  | 0.0  | 01   | 0.746 |
| G38 x G69 | 28  | 0.03 | 8.7  | 0.804 |
| G39 x G04 | 28  | 0.03 | 1.3  | 0.641 |
| G39 x G54 | 28  | 0.01 | 2.7  | 0.831 |
| G39 x G61 | 28  | 0.05 | 08   | 0.721 |
| G44 x G04 | 64  | 0.13 | 14.6 | 0.855 |
| G44 x G27 | 46  | 0.0  | 01   | 0.736 |
| G49 x G06 | 02  | 0.06 | 1.4  | 0.828 |
| G54 x G04 | 0.0 | 0.04 | 1.4  | 0.863 |
| G54 x G19 | 0.0 | 0.01 | 3.3  | 0.861 |
| G54 x G24 | 81  | 0.01 | 2.6  | 0.814 |
| G80 x G04 | 38  | 0.04 | 6.4  | 0.791 |
| G80 x G19 | 38  | 0.0  | 1.7  | 0.831 |
| G80 x G35 | 40  | 0.0  | 2.7  | 0.675 |

**Table S3.** Cross combinations that were done for seed\_set evaluation with their respective parental difference variables

| Combination | Chrom | DNA  | Style | cJaccard |
|-------------|-------|------|-------|----------|
| G01 x G21   | 30.0  | 0.10 | 1.3   | 0.792    |
| G01 x G35   | 32.0  | 0.02 | 2.0   | 0.846    |
| G01 x G61   | 30.0  | 0.04 | 1.0   | 0.772    |
| G03 x G04   | 10.0  | 0.02 | 9.4   | 0.777    |
| G03 x G21   | 10.0  | 0.10 | 2.4   | 0.796    |
| G03 x G30   | 10.0  | 0.08 | 2.7   | 0.854    |
| G03 x G35   | 12.0  | 0.02 | 5.7   | 0.842    |
| G03 x G38   | 18.0  | 0.01 | 13.7  | 0.754    |
| G03 x G39   | 18.0  | 0.01 | 10.7  | 0.785    |
| G03 x G44   | 54.0  | 0.11 | 24.0  | 0.869    |
| G03 x G69   | 46.0  | 0.04 | 5.0   | 0.839    |
| G04 x G06   | 0.0   | 0.08 | 2.0   | 0.847    |
| G04 x G30   | 0.0   | 0.06 | 6.7   | 0.859    |
| G04 x G38   | 28.0  | 0.03 | 4.3   | 0.664    |
| G04 x G39   | 28.0  | 0.03 | 1.3   | 0.641    |
| G04 x G61   | 0.0   | 0.02 | 6.7   | 0.69     |
| G04 x G69   | 56.0  | 0.06 | 4.4   | 0.809    |
| G04 x G71   | 0.0   | 0.01 | 5.7   | 0.799    |
| G05 x G04   | 0.0   | 0.03 | 2.4   | 0.771    |
| G05 x G14   | 14.0  | 0.06 | 4.0   | 0.773    |
| G06 x G04   | 0.0   | 0.08 | 2.0   | 0.847    |
| G06 x G14   | 14.0  | 0.08 | 3.6   | 0.845    |
| G07 x G04   | 60.0  | 0.02 | 7.7   | 0.763    |

|           |      |      |      |       |
|-----------|------|------|------|-------|
| G07 x G16 | 46.0 | 0.08 | 5.7  | 0.744 |
| G07 x G27 | 42.0 | 0.11 | 21.3 | 0.919 |
| G07 x G35 | 62.0 | 0.02 | 4.0  | 0.848 |
| G07 x G61 | 60.0 | 0.04 | 1.0  | 0.753 |
| G13 x G04 | 10.0 | 0.05 | 7.7  | 0.82  |
| G13 x G06 | 10.0 | 0.03 | 5.7  | 0.833 |
| G13 x G14 | 4.0  | 0.05 | 9.3  | 0.799 |
| G13 x G38 | 18.0 | 0.02 | 12.0 | 0.782 |
| G14 x G06 | 14.0 | 0.01 | 3.6  | 0.845 |
| G14 x G61 | 14.0 | 0.02 | 8.3  | 0.701 |
| G14 x G69 | 42.0 | 0.06 | 6.0  | 0.811 |
| G14 x G71 | 14.0 | 0.01 | 7.3  | 0.804 |
| G14 x G80 | 24.0 | 0.05 | 8.0  | 0.803 |
| G16 x G04 | 14.0 | 0.06 | 2.0  | 0.727 |
| G16 x G27 | 4.0  | 0.19 | 15.6 | 0.89  |
| G16 x G37 | 14.0 | 0.10 | 2.4  | 0.855 |
| G16 x G76 | 14.0 | 0.10 | 4.7  | 0.557 |
| G18 x G04 | 10.0 | 0.06 | 9.4  | 0.834 |
| G18 x G14 | 4.0  | 0.06 | 11.0 | 0.816 |
| G18 x G16 | 4.0  | 0.11 | 7.4  | 0.865 |
| G18 x G21 | 10.0 | 0.14 | 2.4  | 0.838 |
| G18 x G27 | 8.0  | 0.07 | 23.0 | 0.878 |
| G18 x G35 | 12.0 | 0.01 | 5.7  | 0.671 |
| G18 x G37 | 10.0 | 0.02 | 5.0  | 0.655 |
| G18 x G39 | 18.0 | 0.03 | 10.7 | 0.815 |
| G18 x G69 | 46.0 | 0.00 | 5.0  | 0.837 |
| G21 x G27 | 18.0 | 0.21 | 20.6 | 0.887 |
| G21 x G37 | 0.0  | 0.12 | 2.6  | 0.866 |
| G22 x G04 | 10.0 | 0.06 | 9.7  | 0.84  |
| G22 x G30 | 10.0 | 0.11 | 3.0  | 0.852 |
| G22 x G35 | 12.0 | 0.02 | 6.0  | 0.683 |
| G22 x G49 | 12.0 | 0.04 | 6.3  | 0.675 |
| G22 x G54 | 10.0 | 0.02 | 8.3  | 0.844 |
| G24 x G27 | 63.0 | 0.09 | 17.6 | 0.859 |
| G27 x G04 | 18.0 | 0.13 | 13.6 | 0.855 |
| G27 x G30 | 18.0 | 0.18 | 20.3 | 0.888 |
| G27 x G54 | 18.0 | 0.09 | 15.0 | 0.891 |
| G30 x G69 | 56.0 | 0.11 | 4.4  | 0.881 |
| G30 x G71 | 0.0  | 0.05 | 5.7  | 0.869 |
| G35 x G14 | 16.0 | 0.05 | 5.3  | 0.842 |
| G35 x G35 | 0.0  | 0.00 | 0.0  | 0.842 |

|           |      |      |      |       |
|-----------|------|------|------|-------|
| G35 x G39 | 30.0 | 0.01 | 5.0  | 0.863 |
| G35 x G44 | 66.0 | 0.09 | 18.3 | 0.849 |
| G35 x G69 | 58.0 | 0.02 | 0.7  | 0.851 |
| G35 x G73 | 1.0  | 0.01 | 1.7  | 0.528 |
| G37 x G44 | 64.0 | 0.09 | 19.0 | 0.854 |
| G37 x G54 | 0.0  | 0.00 | 3.0  | 0.882 |
| G39 x G35 | 30.0 | 0.01 | 5.0  | 0.863 |
| G39 x G44 | 36.0 | 0.10 | 13.3 | 0.869 |
| G39 x G45 | 4.0  | 0.01 | 5.7  | 0.831 |
| G44 x G73 | 65.0 | 0.10 | 20.0 | 0.864 |
| G46 x G30 | 24.0 | 0.07 | 1.7  | 0.833 |
| G46 x G44 | 40.0 | 0.12 | 19.6 | 0.888 |
| G49 x G61 | 2.0  | 0.04 | 3.3  | 0.873 |
| G49 x G73 | 1.0  | 0.01 | 2.0  | 0.489 |
| G50 x G30 | 2.0  | 0.09 | 3.3  | 0.878 |
| G50 x G39 | 30.0 | 0.01 | 4.7  | 0.81  |
| G50 x G44 | 66.0 | 0.09 | 18.0 | 0.86  |
| G50 x G69 | 58.0 | 0.02 | 1.0  | 0.856 |
| G54 x G04 | 0.0  | 0.04 | 1.4  | 0.863 |
| G69 x G04 | 56.0 | 0.06 | 4.4  | 0.809 |
| G69 x G14 | 42.0 | 0.06 | 6.0  | 0.811 |
| G69 x G35 | 58.0 | 0.02 | 0.7  | 0.851 |
| G69 x G54 | 56.0 | 0.02 | 3.0  | 0.854 |
| G71 x G39 | 28.0 | 0.04 | 7.0  | 0.803 |
| G73 x G35 | 2.0  | 0.01 | 1.7  | 0.528 |
| G73 x G44 | 65.0 | 0.10 | 20.0 | 0.864 |
| G77 x G69 | 28.0 | 0.10 | 0.6  | 0.844 |
| G80 x G04 | 38.0 | 0.04 | 6.4  | 0.791 |
| G80 x G27 | 20.0 | 0.09 | 20.0 | 0.846 |
| G80 x G38 | 10.0 | 0.01 | 10.7 | 0.767 |
| G80 x G44 | 26.0 | 0.09 | 21.0 | 0.852 |
| G80 x G46 | 14.0 | 0.03 | 1.4  | 0.818 |

**Table S4.** Cross combinations that were done for seed\_dev evaluation with their respective parental difference variables

| Combination | Chrom | DNA  | Style | cJaccard |
|-------------|-------|------|-------|----------|
| G01 x G03   | 20    | 0    | 3.7   | 0.784    |
| G01 x G06   | 30    | 0.06 | 3.7   | 0.86     |
| G01 x G37   | 30    | 0.02 | 1.3   | 0.844    |
| G01 x G49   | 32    | 0    | 2.3   | 0.866    |
| G01 x G62   | 16    | 0.02 | 1     | 0.733    |
| G03 x G04   | 10    | 0.02 | 9.4   | 0.777    |
| G03 x G14   | 4     | 0.03 | 11    | 0.783    |
| G03 x G35   | 12    | 0.02 | 5.7   | 0.842    |
| G03 x G37   | 14    | 0.09 | 1.3   | 0.844    |
| G03 x G38   | 18    | 0.01 | 13.7  | 0.754    |
| G03 x G39   | 18    | 0.01 | 10.7  | 0.785    |
| G03 x G49   | 12    | 0    | 6     | 0.818    |
| G04 x G03   | 10    | 0.02 | 9.4   | 0.777    |
| G04 x G09   | 0     | 0.01 | 1     | 0.686    |
| G04 x G14   | 14    | 0    | 1.6   | 0.335    |
| G04 x G19   | 0     | 0.04 | 4.7   | 0.791    |
| G04 x G21   | 0     | 0.08 | 7     | 0.821    |
| G04 x G27   | 18    | 0.13 | 13.6  | 0.855    |
| G04 x G30   | 0     | 0.06 | 6.7   | 0.859    |
| G04 x G35   | 2     | 0.04 | 3.7   | 0.857    |
| G04 x G39   | 28    | 0.03 | 1.3   | 0.641    |
| G04 x G49   | 2     | 0.02 | 3.4   | 0.864    |
| G04 x G54   | 0     | 0.04 | 1.4   | 0.863    |
| G04 x G61   | 0     | 0.02 | 2     | 0.69     |
| G04 x G62   | 14    | 0.04 | 6.7   | 0.789    |
| G04 x G69   | 56    | 0.06 | 4.4   | 0.809    |
| G04 x G71   | 0     | 0.01 | 5.7   | 0.799    |
| G04 x G80   | 38    | 0.04 | 6.4   | 0.791    |
| G05 x G04   | 26    | 0.03 | 2.4   | 0.771    |
| G05 x G14   | 12    | 0.04 | 4     | 0.773    |
| G05 x G19   | 26    | 0.01 | 2.3   | 0.818    |
| G05 x G21   | 26    | 0.11 | 4.6   | 0.818    |
| G05 x G30   | 26    | 0.09 | 4.3   | 0.858    |
| G05 x G35   | 28    | 0.01 | 1.3   | 0.654    |
| G05 x G37   | 26    | 0.01 | 2     | 0.68     |
| G05 x G39   | 2     | 0.01 | 3.7   | 0.795    |
| G05 x G44   | 38    | 0.1  | 17    | 0.871    |
| G05 x G49   | 28    | 0.01 | 1     | 0.708    |

|           |    |      |      |       |
|-----------|----|------|------|-------|
| G05 x G54 | 26 | 0    | 1    | 0.852 |
| G05 x G62 | 12 | 0.01 | 4.3  | 0.611 |
| G05 x G69 | 30 | 0.03 | 2    | 0.813 |
| G05 x G71 | 26 | 0.04 | 3.3  | 0.814 |
| G05 x G73 | 28 | 0.01 | 3    | 0.683 |
| G06 x G27 | 18 | 0.05 | 15.6 | 0.871 |
| G06 x G30 | 0  | 0.14 | 4.7  | 0.811 |
| G06 x G45 | 24 | 0.07 | 2.4  | 0.881 |
| G06 x G49 | 2  | 0.06 | 1.4  | 0.828 |
| G06 x G62 | 14 | 0.04 | 4.7  | 0.853 |
| G06 x G69 | 56 | 0.02 | 2.4  | 0.882 |
| G06 x G75 | 2  | 0.18 | 3.7  | 0.869 |
| G06 x G76 | 0  | 0.16 | 4.7  | 0.864 |
| G07 x G69 | 4  | 0.04 | 3.3  | 0.809 |
| G09 x G04 | 0  | 0.01 | 1    | 0.686 |
| G09 x G14 | 14 | 0.01 | 0.6  | 0.668 |
| G09 x G16 | 14 | 0.05 | 3    | 0.67  |
| G09 x G30 | 0  | 0.04 | 7.7  | 0.893 |
| G09 x G38 | 28 | 0.05 | 3.3  | 0.674 |
| G09 x G39 | 28 | 0.04 | 0.3  | 0.721 |
| G09 x G54 | 0  | 0.05 | 2.4  | 0.866 |
| G09 x G75 | 2  | 0.09 | 6.7  | 0.822 |
| G13 x G09 | 10 | 0.06 | 8.7  | 0.815 |
| G13 x G19 | 10 | 0.01 | 3    | 0.821 |
| G13 x G35 | 12 | 0.01 | 4    | 0.689 |
| G13 x G37 | 10 | 0.01 | 3.3  | 0.669 |
| G13 x G54 | 10 | 0.01 | 6.3  | 0.871 |
| G13 x G62 | 4  | 0.01 | 1    | 0.722 |
| G13 x G69 | 46 | 0.01 | 3.3  | 0.799 |
| G14 x G04 | 14 | 0    | 1.6  | 0.335 |
| G14 x G09 | 14 | 0.01 | 0.6  | 0.668 |
| G14 x G16 | 0  | 0.06 | 3.6  | 0.703 |
| G14 x G21 | 14 | 0.08 | 8.6  | 0.773 |
| G14 x G30 | 14 | 0.05 | 8.3  | 0.857 |
| G14 x G35 | 16 | 0.05 | 5.3  | 0.842 |
| G14 x G39 | 14 | 0.03 | 0.3  | 0.631 |
| G14 x G45 | 10 | 0.02 | 6    | 0.841 |
| G14 x G46 | 10 | 0.02 | 6.6  | 0.83  |
| G14 x G69 | 42 | 0.06 | 6    | 0.811 |
| G16 x G09 | 14 | 0.05 | 3    | 0.67  |
| G16 x G14 | 0  | 0.06 | 3.6  | 0.703 |
| G16 x G30 | 14 | 0    | 4.7  | 0.866 |

|           |    |      |      |       |
|-----------|----|------|------|-------|
| G16 x G39 | 14 | 0.09 | 3.3  | 0.737 |
| G16 x G49 | 16 | 0.08 | 1.4  | 0.855 |
| G16 x G69 | 42 | 0.12 | 2.4  | 0.831 |
| G16 x G71 | 14 | 0.05 | 3.7  | 0.835 |
| G16 x G73 | 16 | 0.09 | 3.4  | 0.879 |
| G16 x G80 | 24 | 0.1  | 4.4  | 0.845 |
| G18 x G01 | 20 | 0.04 | 3.7  | 0.852 |
| G18 x G04 | 10 | 0.06 | 9.4  | 0.834 |
| G18 x G14 | 4  | 0.06 | 11   | 0.816 |
| G18 x G19 | 10 | 0.01 | 4.7  | 0.836 |
| G18 x G27 | 8  | 0.07 | 23   | 0.878 |
| G18 x G49 | 12 | 0.04 | 6    | 0.646 |
| G19 x G04 | 0  | 0.04 | 4.7  | 0.791 |
| G19 x G16 | 14 | 0.1  | 2.7  | 0.815 |
| G19 x G21 | 0  | 0.12 | 2.3  | 0.779 |
| G19 x G30 | 0  | 0.1  | 2    | 0.853 |
| G19 x G38 | 28 | 0.01 | 9    | 0.789 |
| G19 x G39 | 28 | 0.01 | 6    | 0.795 |
| G19 x G54 | 0  | 0.01 | 3.3  | 0.861 |
| G19 x G69 | 56 | 0.02 | 0.3  | 0.801 |
| G19 x G75 | 2  | 0.14 | 1    | 0.793 |
| G19 x G76 | 0  | 0.12 | 2    | 0.814 |
| G19 x G80 | 38 | 0    | 1.7  | 0.831 |
| G21 x G19 | 0  | 0.12 | 2.3  | 0.779 |
| G21 x G61 | 0  | 0.06 | 5    | 0.803 |
| G22 x G35 | 12 | 0.02 | 6    | 0.683 |
| G22 x G37 | 10 | 0.02 | 5.3  | 0.658 |
| G22 x G49 | 12 | 0.04 | 6.3  | 0.675 |
| G22 x G69 | 46 | 0    | 5.3  | 0.847 |
| G24 x G39 | 54 | 0.02 | 5.3  | 0.775 |
| G24 x G69 | 26 | 0.02 | 0.4  | 0.652 |
| G27 x G04 | 18 | 0.13 | 13.6 | 0.855 |
| G27 x G06 | 18 | 0.05 | 15.6 | 0.871 |
| G27 x G21 | 18 | 0.21 | 20.6 | 0.887 |
| G27 x G39 | 10 | 0.1  | 12.3 | 0.881 |
| G27 x G42 | 0  | 0    | 1.4  | 0.543 |
| G27 x G44 | 46 | 0    | 1    | 0.736 |
| G30 x G04 | 0  | 0.06 | 6.7  | 0.859 |
| G30 x G14 | 14 | 0.05 | 8.3  | 0.857 |
| G30 x G39 | 28 | 0.08 | 8    | 0.836 |
| G30 x G54 | 0  | 0.09 | 5.3  | 0.864 |
| G30 x G69 | 56 | 0.11 | 2.3  | 0.881 |



|           |    |      |      |       |
|-----------|----|------|------|-------|
| G35 x G04 | 2  | 0.04 | 3.7  | 0.857 |
| G35 x G19 | 2  | 0    | 1    | 0.84  |
| G35 x G38 | 60 | 0.01 | 8    | 0.831 |
| G35 x G39 | 30 | 0.01 | 5    | 0.863 |
| G35 x G62 | 16 | 0    | 3    | 0.713 |
| G35 x G75 | 2  | 0.14 | 2    | 0.852 |
| G37 x G03 | 14 | 0.09 | 1.3  | 0.856 |
| G37 x G62 | 14 | 0    | 2.3  | 0.745 |
| G37 x G69 | 56 | 0.02 | 0    | 0.865 |
| G38 x G03 | 18 | 0.01 | 13.7 | 0.754 |
| G38 x G09 | 28 | 0.05 | 3.3  | 0.674 |
| G38 x G19 | 28 | 0.01 | 9    | 0.789 |
| G38 x G35 | 30 | 0.01 | 8    | 0.831 |
| G38 x G61 | 28 | 0.05 | 6.3  | 0.651 |
| G38 x G62 | 14 | 0.01 | 11   | 0.798 |
| G38 x G69 | 28 | 0.03 | 8.7  | 0.804 |
| G39 x G03 | 18 | 0.01 | 10.7 | 0.785 |
| G39 x G04 | 28 | 0.03 | 1.3  | 0.641 |
| G39 x G09 | 28 | 0.04 | 0.3  | 0.721 |
| G39 x G14 | 14 | 0.03 | 0.3  | 0.631 |
| G39 x G16 | 14 | 0.09 | 3.3  | 0.737 |
| G39 x G21 | 28 | 0.11 | 8.3  | 0.767 |
| G39 x G24 | 54 | 0.02 | 5.3  | 0.775 |
| G39 x G27 | 10 | 0.1  | 12.3 | 0.881 |
| G39 x G30 | 28 | 0.08 | 8    | 0.836 |
| G39 x G49 | 30 | 0.01 | 4.7  | 0.846 |
| G39 x G54 | 28 | 0.01 | 2.7  | 0.831 |
| G39 x G61 | 28 | 0.05 | 3.3  | 0.721 |
| G39 x G62 | 14 | 0.01 | 8    | 0.778 |
| G39 x G69 | 28 | 0.03 | 5.7  | 0.821 |
| G42 x G21 | 18 | 0.21 | 22   | 0.906 |
| G42 x G27 | 0  | 0    | 1.4  | 0.543 |
| G42 x G44 | 46 | 0    | 0.4  | 0.693 |
| G42 x G45 | 6  | 0.11 | 19.4 | 0.878 |
| G42 x G54 | 18 | 0.09 | 16.4 | 0.913 |
| G44 x G04 | 64 | 0.13 | 14.6 | 0.855 |
| G44 x G21 | 64 | 0.21 | 21.6 | 0.868 |
| G44 x G27 | 46 | 0    | 1    | 0.736 |
| G44 x G42 | 46 | 0    | 0.4  | 0.693 |
| G44 x G54 | 64 | 0.09 | 16   | 0.918 |
| G45 x G06 | 24 | 0.07 | 2.4  | 0.881 |
| G45 x G14 | 10 | 0.02 | 6    | 0.841 |

|           |    |      |      |       |
|-----------|----|------|------|-------|
| G45 x G49 | 26 | 0    | 1    | 0.849 |
| G45 x G54 | 26 | 0.02 | 3    | 0.884 |
| G45 x G69 | 32 | 0.04 | 0    | 0.866 |
| G49 x G04 | 2  | 0.02 | 3.4  | 0.864 |
| G49 x G16 | 16 | 0.08 | 1.4  | 0.855 |
| G49 x G35 | 0  | 0.02 | 0.3  | 0.486 |
| G49 x G39 | 30 | 0.01 | 4.7  | 0.846 |
| G49 x G45 | 26 | 0    | 1    | 0.849 |
| G49 x G62 | 16 | 0.02 | 3.3  | 0.767 |
| G49 x G69 | 58 | 0.04 | 1    | 0.858 |
| G49 x G80 | 40 | 0.03 | 3    | 0.672 |
| G50 x G04 | 2  | 0.04 | 3.4  | 0.831 |
| G50 x G16 | 16 | 0.1  | 1.4  | 0.859 |
| G50 x G21 | 26 | 0.12 | 3.6  | 0.871 |
| G50 x G38 | 30 | 0.01 | 7.7  | 0.825 |
| G50 x G39 | 30 | 0.01 | 4.7  | 0.81  |
| G50 x G49 | 0  | 0.02 | 0    | 0.512 |
| G50 x G54 | 2  | 0    | 2    | 0.882 |
| G50 x G61 | 2  | 0.06 | 1.4  | 0.868 |
| G50 x G69 | 58 | 0.02 | 1    | 0.856 |
| G50 x G76 | 2  | 0.12 | 3.3  | 0.844 |
| G54 x G04 | 0  | 0.04 | 1.4  | 0.863 |
| G54 x G06 | 0  | 0.04 | 0.6  | 0.848 |
| G54 x G16 | 14 | 0.09 | 0.6  | 0.867 |
| G54 x G19 | 0  | 0.01 | 3.3  | 0.861 |
| G54 x G21 | 0  | 0.12 | 5.6  | 0.852 |
| G54 x G24 | 82 | 0.01 | 2.6  | 0.814 |
| G54 x G30 | 0  | 0.09 | 5.3  | 0.864 |
| G54 x G39 | 28 | 0.01 | 2.7  | 0.831 |
| G54 x G42 | 18 | 0.09 | 16.4 | 0.913 |
| G54 x G44 | 64 | 0.09 | 16   | 0.918 |
| G54 x G45 | 24 | 0.02 | 3    | 0.884 |
| G54 x G69 | 56 | 0.02 | 3    | 0.854 |
| G54 x G76 | 0  | 0.12 | 5.3  | 0.877 |
| G54 x G80 | 38 | 0.01 | 5    | 0.857 |
| G57 x G16 | 14 | 0.04 | 4.7  | 0.724 |
| G57 x G61 | 0  | 0    | 4.7  | 0.581 |
| G61 x G04 | 0  | 0.02 | 6.7  | 0.69  |
| G61 x G30 | 0  | 0.04 | 0    | 0.869 |
| G62 x G04 | 14 | 0.04 | 6.7  | 0.789 |
| G62 x G19 | 14 | 0    | 2    | 0.809 |
| G62 x G35 | 16 | 0    | 3    | 0.713 |

|           |    |      |     |       |
|-----------|----|------|-----|-------|
| G62 x G37 | 14 | 0    | 2.3 | 0.745 |
| G62 x G38 | 14 | 0.01 | 11  | 0.798 |
| G62 x G39 | 14 | 0.01 | 8   | 0.778 |
| G62 x G49 | 16 | 0.02 | 3.3 | 0.767 |
| G62 x G69 | 42 | 0.02 | 2.3 | 0.791 |
| G62 x G75 | 16 | 0.12 | 1   | 0.826 |
| G69 x G04 | 56 | 0.06 | 4.4 | 0.809 |
| G69 x G16 | 42 | 0.12 | 2.4 | 0.831 |
| G69 x G21 | 56 | 0.14 | 2.6 | 0.838 |
| G69 x G24 | 26 | 0.01 | 0.4 | 0.652 |
| G69 x G30 | 56 | 0.11 | 2.3 | 0.881 |
| G69 x G39 | 28 | 0.03 | 5.7 | 0.821 |
| G69 x G49 | 58 | 0.04 | 1   | 0.858 |
| G69 x G54 | 56 | 0.02 | 3   | 0.854 |
| G69 x G80 | 18 | 0.01 | 2   | 0.689 |
| G71 x G04 | 0  | 0.01 | 5.7 | 0.799 |
| G71 x G14 | 14 | 0.01 | 7.3 | 0.804 |
| G71 x G16 | 14 | 0.05 | 3.7 | 0.835 |
| G71 x G35 | 2  | 0.05 | 2   | 0.853 |
| G73 x G04 | 2  | 0.03 | 5.4 | 0.848 |
| G73 x G54 | 2  | 0.01 | 4   | 0.881 |
| G75 x G21 | 2  | 0.02 | 2.3 | 0.563 |
| G77 x G19 | 28 | 0.08 | 0.3 | 0.76  |
| G80 x G04 | 38 | 0.04 | 6.4 | 0.791 |
| G80 x G16 | 24 | 0.1  | 4.4 | 0.845 |
| G80 x G21 | 38 | 0.12 | 0.6 | 0.845 |
| G80 x G24 | 44 | 0    | 2.4 | 0.619 |
| G80 x G39 | 10 | 0.02 | 7.7 | 0.802 |
| G80 x G69 | 18 | 0.01 | 2   | 0.689 |
| G80 x G76 | 38 | 0.13 | 0.3 | 0.827 |

**Table S5.** Intercept and slope of the logistic regression model in the logit scale for pollen tube growth

| GenType  | stat  | estimate | stderr | t-value | p-value | lwr    | upr   |
|----------|-------|----------|--------|---------|---------|--------|-------|
| Chrom    | icept | 1.18     | 0.34   | 3.47    | 0       | 0.54   | 1.88  |
| Chrom    | slope | -0.01    | 0.01   | -0.72   | 0.47    | -0.03  | 0.01  |
| DNA      | icept | 1.07     | 0.33   | 3.23    | 0       | 0.44   | 1.74  |
| DNA      | slope | -1.41    | 5.47   | -0.26   | 0.8     | -11.96 | 9.76  |
| Style    | icept | 1.24     | 0.36   | 3.43    | 0       | 0.55   | 1.98  |
| Style    | slope | -0.04    | 0.05   | -0.85   | 0.4     | -0.14  | 0.06  |
| cJaccard | icept | 8.98     | 3.01   | 2.98    | 0       | 3.81   | 15.7  |
| cJaccard | slope | -10.08   | 3.71   | -2.71   | 0.01    | -18.29 | -3.63 |

**Table S6.** Intercept and slope of the logistic regression model in the logit scale for seed\_set

| GenType  | stat  | estimate | stderr | t-value | p-value | lwr     | upr    |
|----------|-------|----------|--------|---------|---------|---------|--------|
| Chrom    | icept | -2.6     | 0.6    | -4.35   | 0       | -3.97   | -1.57  |
| Chrom    | slope | -0.01    | 0.02   | -0.28   | 0.78    | -0.06   | 0.03   |
| DNA      | icept | -0.93    | 0.43   | -2.19   | 0.03    | -1.8    | -0.11  |
| DNA      | slope | -67.08   | 22.53  | -2.98   | 0       | -121.84 | -31.68 |
| Style    | icept | -1.84    | 0.62   | -2.96   | 0       | -3.1    | -0.63  |
| Style    | slope | -0.22    | 0.18   | -1.27   | 0.21    | -0.68   | 0.01   |
| cJaccard | icept | 2.65     | 2.83   | 0.94    | 0.35    | -3.62   | 8.04   |
| cJaccard | slope | -6.88    | 3.73   | -1.85   | 0.07    | -14.24  | 1.05   |

**Table S7.** Intercept and slope of the logistic regression model in the logit scale for seed\_dev

| GenType  | stat  | estimate | stderr | t-value | p-value | lwr    | upr   |
|----------|-------|----------|--------|---------|---------|--------|-------|
| Chrom    | icept | -1.81    | 0.2    | -8.88   | 0       | -2.23  | -1.43 |
| Chrom    | slope | -0.02    | 0.01   | -2.39   | 0.02    | -0.04  | 0     |
| DNA      | icept | -1.62    | 0.22   | -7.53   | 0       | -2.06  | -1.21 |
| DNA      | slope | -15.76   | 5.13   | -3.07   | 0       | -26.59 | -6.36 |
| Style    | icept | -1.65    | 0.23   | -7.07   | 0       | -2.12  | -1.2  |
| Style    | slope | -0.16    | 0.06   | -2.62   | 0.01    | -0.29  | -0.05 |
| cJaccard | icept | 3.07     | 0.9    | 3.41    | 0       | 1.29   | 4.84  |
| cJaccard | slope | -7       | 1.23   | -5.7    | 0       | -9.44  | -4.61 |
